# Supplementary material for: Calcineurin A beta deficiency ameliorates HFD-induced hypothalamic astrocytosis in mice
Source: Springer Nature journal article supplement (doi:10.1186/s12974-018-1076-x), 2018-02-08

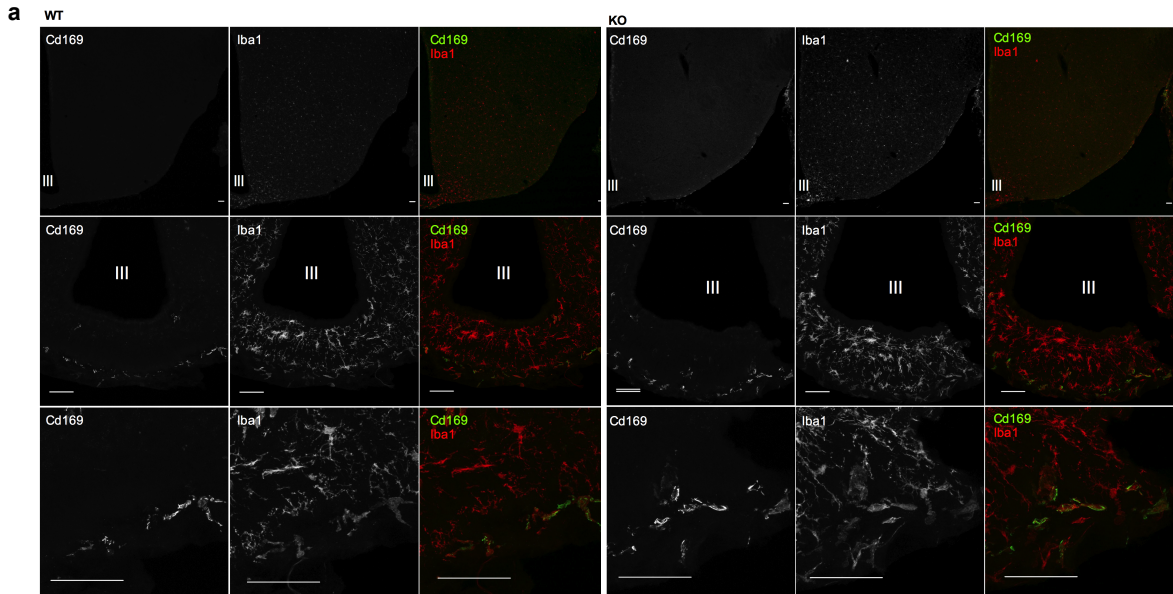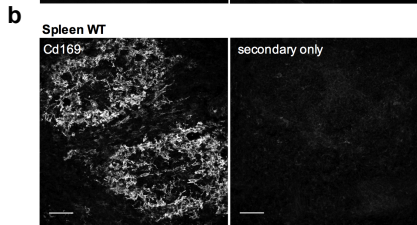

Supplement: MOESM1 [file 15448818]
